1 **Title:** IgG antibody responses are preferential compared to IgM for use as  
2 serological markers for detecting recent exposure to *Plasmodium vivax* infection

3 **Running head:** IgM-based serological markers for *P. vivax*

4

5 **Authors:** Rhea J Longley<sup>1,2</sup>, Michael T White<sup>3</sup>, Jessica Brewster<sup>1</sup>, Zoe SJ Liu<sup>1,2</sup>,  
6 Caitlin Bourke<sup>1,2</sup>, Eizo Takashima<sup>4</sup>, Matthias Harbers<sup>5</sup>, Wai-Hong Tham<sup>2,6</sup>, Julie  
7 Healer<sup>2,6</sup>, Chetan E Chitnis<sup>7</sup>, Wuelton Monteiro<sup>8,9</sup>, Marcus Lacerda<sup>10</sup>, Jetsumon  
8 Sattabongkot<sup>11</sup>, Takafumi Tsuboi<sup>4</sup>, Ivo Mueller<sup>1,2,3</sup>

9

10 <sup>1</sup> Population Health and Immunity Division, The Walter and Eliza Hall Institute of  
11 Medical Research, Parkville 3052, Australia

12 <sup>2</sup> Department of Medical Biology, University of Melbourne, Parkville 3052, Australia

13 <sup>3</sup> Malaria Parasites and Hosts Unit, Department of Parasites and Insect Vectors,  
14 Institut Pasteur, Paris, France

15 <sup>4</sup> Division of Malaria Research, Proteo-Science Center, Ehime University,  
16 Matsuyama, Japan

17 <sup>5</sup> CellFree Sciences Co., Ltd., RIKEN Center for Integrative Medical Sciences,  
18 Yokohama, Japan

19 <sup>6</sup> Infection and Immunity Division, The Walter and Eliza Hall Institute of Medical  
20 Research, Parkville 3052, Australia

21 <sup>7</sup> Malaria Parasite Biology and Vaccines, Department of Parasites and Insect  
22 Vectors, Institut Pasteur, Paris, France

23 <sup>8</sup> Fundação de Medicina Tropical Dr. Heitor Vieira Dourado, Manaus, Brazil

24 <sup>9</sup> Universidade do Estado do Amazonas, Manaus, Brazil

25 <sup>10</sup> Instituto Leônicas & Maria Deane (Fiocruz), Manaus, Brazil

26 <sup>11</sup> Mahidol Vivax Research Unit, Faculty of Tropical Medicine, Mahidol University,  
27 Bangkok 10400, Thailand

28 **NOTE:** This preprint reports new research that has not been certified by peer review and should not be used to guide clinical practice.

29 **Corresponding author:** Ivo Mueller, [mueller@wehi.edu.au](mailto:mueller@wehi.edu.au), +61 3 9345 2936

30 **Word counts:** Abstract 100, Text 1973

31 **Footnotes:**

32 (1) RJL, MW, TT and IM are inventors on patent PCT/US17/67926 on a system,  
33 method, apparatus and diagnostic test for *Plasmodium vivax*. No other  
34 authors declare a conflict of interest.

35 (2) This work was supported by the National Health and Medical Research  
36 Council Australia (#1092789, #1134989 and #1043345 to IM and #1143187  
37 to W-HT), the National Institute of Allergy and Infectious Diseases (NIH grant  
38 5R01 AI 104822 to JS) and the Global Health Innovative Technology Fund  
39 (T2015-142 to IM). The Brazilian team was partly funded by Fundação de  
40 Amparo à Pesquisa do Estado do Amazonas-FAPEAM (PAPAC 005/2019  
41 and Pró-Estado). ML and WM are research fellows from CNPq. Additional  
42 funding directly supporting field studies was from the TransEPI consortium  
43 (supported by the Bill and Melinda Gates Foundation). We also acknowledge  
44 support from the National Research Council of Thailand. This work was made  
45 possible through Victorian State Government Operational Infrastructure  
46 Support and Australian Government NHMRC IRIISS.

47 (3) Part of this work was presented by RJL at the 47<sup>th</sup> Annual Scientific Meeting  
48 of the Australasian Society for Immunology, December 2018, Perth, Australia.

49 (4) Correspondence and requests for reprints should be addressed to Professor  
50 Ivo Mueller, The Walter and Eliza Hall Institute of Medical Research, 1G  
51 Royal Parade, Parkville 3052, Victoria, Australia, [mueller@wehi.edu.au](mailto:mueller@wehi.edu.au), +61  
52 3 9345 2936.

53

54 **Abstract:**

55 To achieve malaria elimination, new tools are required to explicitly target  
56 *Plasmodium vivax*. Recently, a novel panel of *P. vivax* proteins were identified and  
57 validated as serological markers for detecting recent exposure to *P. vivax* within the  
58 last 9 months. In order to improve the sensitivity and specificity of these markers, IgM  
59 in addition to IgG antibody responses were assessed to a down-selected panel of 20  
60 *P. vivax* proteins. IgM was tested using archival plasma samples from observational  
61 cohort studies conducted in malaria-endemic regions of Thailand and Brazil. IgM  
62 responses to these proteins generally had poorer classification performance than  
63 IgG.

64

65 **Keywords:** IgG, IgM, serology, surveillance, malaria, *Plasmodium vivax*, serological  
66 exposure markers, antibody

67 **TEXT**

68 **Background:**

69 Infections due to *Plasmodium vivax* are a major challenge for malaria elimination.  
70 This is due to unique biological features of *P. vivax* parasites, including an arrested  
71 stage in the liver (hypnozoites) that can reactivate weeks to months later causing  
72 relapses of clinical disease. Individuals with hypnozoites are major reservoirs of  
73 transmission, and are responsible for over 80% of blood-stage *P. vivax* infections [1].  
74 Another challenge is the high proportion of low-density, asymptomatic blood-stage  
75 infections due to *P. vivax* [2], particularly in low-transmission regions. These factors  
76 make it difficult to identify not only infected individuals but also delineate pockets of  
77 ongoing, local transmission. It is therefore critical that novel tools are developed that  
78 enable efficient identification of at-risk individuals that should be targeted for malaria  
79 interventions.

80

81 We have recently identified and validated a novel panel of *P. vivax* proteins that  
82 induce IgG antibody responses reflective of recent exposure to *P. vivax* blood-stage  
83 infections [3]. Combinations of IgG antibody responses to 5-8 *P. vivax* proteins can  
84 accurately classify (with 80% sensitivity and specificity) whether an individual has  
85 had a *P. vivax* infection within the last 9 months. We chose this 9-month time frame  
86 as individuals who have had a detectable blood-stage infection in this period, and  
87 have not been treated with anti-liver-stage drugs, are likely to be harbouring  
88 hypnozoites in their livers. Our novel serological exposure markers therefore  
89 represent the first test that can, indirectly, identify hypnozoite carriers. This tool could  
90 play an important role in malaria elimination by offering an alternative to mass drug  
91 administration strategies (MDA, where everyone is treated), or mass screening and  
92 treatment (MSAT) strategies performed using currently available diagnostics for  
93 blood-stage parasites. Whilst effective, MDA results in a high level of overtreatment.  
94 Conversely, MSAT is ineffective using currently available technologies [4]. We have

95 proposed an alternative strategy termed “serological testing and treatment”, whereby  
96 individuals are tested using our serological exposure markers and treatment given to  
97 those exposed during the past 9 months.

98

99 Here, we investigate the potential utility of alternative biomarkers to IgG antibody  
100 responses as serological exposure markers. We previously observed that IgG  
101 responses to different *P. vivax* proteins were highly correlated [3], and this is likely  
102 why we were unable to improve the classification accuracy by simply incorporating  
103 responses to more antigens into the algorithm. IgM antibody responses to the same  
104 *P. vivax* protein are only weakly correlated to IgG [5] and are generally thought to  
105 have a different response kinetic (as shown against *P. falciparum* malaria [6] and  
106 other infectious diseases such as West Nile virus [7]). We thus hypothesized that IgM  
107 antibody responses to our panel of *P. vivax* proteins could be used to improve the  
108 classification accuracy by providing additional information into the algorithm.

109

#### 110 **Methods:**

111 We tested our hypothesis using samples from two observational cohort studies  
112 conducted over 2013-2014: one in the Kanchanaburi and Ratchaburi provinces of  
113 western Thailand [8] and one in Manaus in the Brazilian Amazon [3]. We utilized  
114 plasma samples available from the last visits of these cohorts (n = 829 Thailand, n =  
115 925 Brazil), as previously described [3]. After enrolment individuals were sampled  
116 every month over the yearlong cohort, with 13-14 active case detection visits  
117 performed (with PCR-based detection of malaria infections). This enabled us to  
118 relate IgM (or IgG) antibody levels measured at the last visit with time since previous  
119 detected *P. vivax* infection. All individuals provided informed consent or assent, and  
120 the studies were approved locally by the Ethics Committee of the Faculty of Tropical  
121 Medicine, Mahidol University, Thailand (MUTM 2013-027-01), and the Brazilian  
122 National Committee of Ethics (CONEP) (349.211/2013). We also utilized three

123 panels of malaria-naïve control plasma samples as previously described [9]: 102  
124 samples from the Volunteer Blood Donor Registry (VBDR), Melbourne, Australia, 100  
125 samples from the Australian Red Cross (ARC), Melbourne, Australia and 72 samples  
126 from the Thai Red Cross (TRC), Bangkok, Thailand. The Human Research Ethics  
127 Committee at WEHI approved usage of all samples at WEHI, and collection of the  
128 malaria-naïve control samples (#14/02).

129

130 IgM antibody responses were measured against a panel of 18 or 20 *P. vivax* proteins  
131 in samples from the Thai or Brazilian cohorts, respectively (see Table S1 for full list  
132 of proteins, expression and purification method, sequence region). These proteins  
133 were selected as they were the best performing when using IgG responses in the  
134 first iteration of our algorithm [9]. The *P. vivax* proteins were coupled to non-magnetic  
135 COOH microspheres as previously described [10], and IgM levels measured using a  
136 modified multiplexed Luminex® assay [9]. Modifications were plasma samples  
137 diluted to 1/200 (instead of 1/100 for IgG), and use of the secondary donkey F(ab')<sub>2</sub>  
138 anti-human IgM Fc<sub>5</sub>, Jackson ImmunoResearch Laboratories, Inc., at 1/400 dilution.  
139 Median fluorescent intensity (MFI) values from the Luminex®-200 were converted to  
140 relative antibody units based on a standard curve run on each plate generated from a  
141 positive control plasma pool consisting of highly immune adults from Papua New  
142 Guinea [10]. Data for KMZ83376.1 and PVX\_095055 were not tested/analysed for the  
143 Thai cohort due to inconsistent standard curves. IgG antibody responses against the  
144 same *P. vivax* proteins had previously been measured in all samples as described  
145 [3].

146

147 Individuals from the malaria-endemic cohorts were defined as either i) infected with  
148 *P. vivax* within the last 9 months prior to antibody measurements or ii) not infected  
149 with *P. vivax* within the last 9 months. Individuals from the malaria-naïve control  
150 panels were defined in the latter group. Single antigen and two-antigen linear

151 discriminant analysis (LDA) classifications were performed in R studio using R  
152 version 3.5.3 [11] and the packages MASS [12] and ROCR [13].

153

#### 154 **Results:**

155 We first determined the accuracy for classifying individuals in the Thai and Brazilian  
156 cohorts as recently infected within the last 9 months using IgM antibody responses  
157 against 18 or 20 *P. vivax* proteins (Figure 1), respectively. Overall, we observed  
158 lower levels of classification accuracy with IgM to these proteins as compared to  
159 using IgG [3], as shown in Figure 1 by reference to the top performing serological  
160 exposure marker for IgG (RBP2b). The area under the curve (AUC) values for IgM  
161 ranged from 0.55 – 0.77 for the Thai cohort and 0.50 – 0.72 for the Brazilian cohort  
162 (Table 1). In comparison, the AUC values for IgG for the same proteins ranged from  
163 0.70 – 0.85 for the Thai cohort and 0.65 – 0.82 for the Brazilian cohort (Table S2)  
164 (note these AUC values are different to that in our prior publication [3] as the current  
165 analysis was performed with negative controls from Melbourne and Bangkok only,  
166 not including newer samples from Rio de Janeiro). For IgM, the top performing *P.*  
167 *vivax* protein in both cohorts was PVX\_087885B, annotated as the rhoptry-  
168 associated membrane antigen (RAMA, putative). One other protein PVX\_082735  
169 (thrombospondin-related anonymous protein, TRAP) performed well with IgM in both  
170 the Thai and Brazilian cohorts with AUC values of 0.74 and 0.71, respectively. In the  
171 Thai cohort, the protein PVX\_082670 (merozoite surface protein 7 putative, MSP7)  
172 also performed reasonably well for IgM (AUC 0.75). The AUC for IgM responses  
173 against RBP2b (top performing marker for IgG) were much lower at 0.63 and 0.56.  
174 IgM antibody responses, stratified by time since previous detected *P. vivax* infection  
175 by PCR, are shown in Figures S1 and S2.

176

177 As IgM responses are expected to decay more quickly than IgG (due to a shorter  
178 serum half-life and their characterization as an early response to infection), we

179 hypothesized that IgM responses may be better markers of very recent exposure.  
180 We therefore tested the ability of IgM antibody responses to our 18-20 *P. vivax*  
181 proteins to classify individuals as infected with *P. vivax* within the prior 6, 3 or 1-  
182 month period. As shown in Table 1, for both cohorts, the AUC values did improve  
183 when using a shorter time frame for classification. However, the same proteins  
184 consistently performed well (PVX\_087885, PVX\_082735 and PVX\_082670) with all  
185 classification time frames tested, and the overall improvements were marginal.  
186 Furthermore, classification performance with IgM antibodies was still inferior to  
187 classification with RBP2b IgG.

188

189 Our original results had shown that IgG antibody responses to combinations of  
190 proteins were better at classifying individuals as infected within the last 9 months  
191 compared to individual proteins alone. We therefore tested the classification ability,  
192 using the 9 month time frame, of each IgM antibody response combined with IgG  
193 responses against the top protein RBP2b. Each of the two-antigen combinations (1  
194 IgM with RBP2b IgG) had better classification accuracy than the IgM response alone,  
195 as determined by AUC values (Table 1). In the Thai cohort, all IgM + RBP2b IgG  
196 performed (slightly) better than RBP2b IgG alone, with the exception of two proteins  
197 (PVX\_112670 and PVX\_110810A). In the Brazilian cohort, all IgM + RBP2b IgG  
198 performed (slightly) better than RBP2b IgG alone, with the exception of  
199 PVX\_110810A. The best combination was PVX\_087885 IgM + RBP2b IgG (AUC  
200 0.88) for Thailand and PVX\_082735 IgM + RBP2b IgG (AUC 0.85) for Brazil.

201

## 202 **Discussion:**

203 Serological markers of recent exposure to *P. vivax* infections could play an important  
204 role in malaria elimination by delineating areas of ongoing transmission and  
205 identifying individuals with a high chance of carrying hypnozoites in their livers. In this  
206 study we aimed to improve upon an existing set of serological exposure markers by



207 incorporating IgM, in addition to IgG, responses against these proteins. We  
208 demonstrate that two proteins in particular, PVX\_087885 (RAMA) and PVX\_082735  
209 (TRAP), induce IgM responses reflective of recent exposure to *P. vivax* within the  
210 past 9 months in endemic regions of Thailand and Brazil. They have similar accuracy  
211 as compared to these same antigens using IgG (RAMA performs slightly better with  
212 IgG, TRAP performs slightly better with IgM). However, the accuracy of these  
213 classifications overall is poorer than for the top performing serological marker  
214 (RBP2b) when using IgG, and generally the IgM AUC values for each antigen were  
215 lower than the corresponding IgG AUC values (Table S2). The poorer performance  
216 of IgM responses against these proteins than IgG likely relates to the acquisition and  
217 maintenance of IgM antibody responses following *P. vivax* infections. IgM is  
218 expected to be short-lived following infection, and supporting this we find the  
219 classification accuracy does improve if we define recent exposure within a shorter  
220 time frame (i.e. 1-6 months rather than 9). Another contributing factor is likely the  
221 high background in the non-malaria exposed controls for IgM (Figure S1 and S2),  
222 compared to our previous results for IgG [3].

223

224 When we combined each of the IgM responses against the 18-20 *P. vivax* proteins  
225 tested with the IgG response against RBP2b we demonstrated a clear improvement  
226 in classification performance compared to the single-antigen IgM response alone.  
227 However, there was only a slight improvement compared to the single-antigen  
228 RBP2b IgG alone, signifying that incorporation of IgM responses into the  
229 classification algorithm is unlikely to result in substantial improvements in  
230 classification. A limitation of our research is that we did not exhaustively test all  
231 combinations of IgG and IgM against the down-selected panel of 18-20 *P. vivax*  
232 proteins. We also only measured IgM responses against 18-20 of the top *P. vivax*  
233 proteins as indicated by their classification performance when using IgG responses;  
234 an alternate approach would have been to measure IgM responses to the full panel

235 of 60 proteins. However, we have already demonstrated that incorporating more than  
236 5 IgG responses results in only marginal improvements in classification performance  
237 compared to RBP2b IgG alone, and thus this approach (of exhausting all options) is  
238 unlikely to yield better results.

239

240 Finally, we ultimately aim to develop a point-of-contact test to be used in the field. It  
241 would be a more complicated and costly test if both IgG and IgM responses were  
242 required to be measured. We will therefore not be pursuing IgM responses in our  
243 optimization of our novel panel of serological exposure markers, and will instead  
244 focus on other avenues for improved performance of signals we can obtain from the  
245 IgG responses.

246

247 **Funding:**

248 This work was supported by the National Health and Medical Research Council  
249 Australia (#1092789, #1134989 and #1043345 to IM and #1143187 to W-HT), the  
250 National Institute of Allergy and Infectious Diseases (NIH grant 5R01 AI 104822 to  
251 JS) and the Global Health Innovative Technology Fund (T2015-142 to IM). The  
252 Brazilian team was partly funded by Fundação de Amparo à Pesquisa do Estado do  
253 Amazonas-FAPEAM (PAPAC 005/2019 and Pró-Estado). ML and WM are research  
254 fellows from CNPq. Additional funding directly supporting field studies was from the  
255 TranEPI consortium (supported by the Bill and Melinda Gates Foundation). We also  
256 acknowledge support from the National Research Council of Thailand. This work was  
257 made possible through Victorian State Government Operational Infrastructure  
258 Support and Australian Government NHMRC IRIISS. The Walter and Eliza Hall  
259 Institute of Medical Research, through the Page Betheras Award to RJL, also  
260 provided salary support. RJL is currently supported by an NHMRC Early Career  
261 Investigator Fellowship (1173210). W.H.T. is a Howard Hughes Medical Institute-  
262 Wellcome Trust International Research Scholar (208693/Z/17/Z).

263

264 **Acknowledgments:**

265 We gratefully acknowledge the extensive field teams that contributed to sample  
266 collection and qPCR assays, including Wang Nguitragool, Andrea Kuehn, Yi Wan  
267 Quah, Piyarat Sripoorote, and Andrea Waltmann. We thank all the individuals that  
268 participated in each of the studies, and thank the Australian and Thai Red Cross for  
269 donation of plasma samples. We thank the Volunteer Blood Donor Registry at WEHI  
270 for donation of plasma samples, and Lina Laskos and Jenni Harris for their collection  
271 and advice. We thank Christopher King (Case Western Reserve University) for  
272 provision of the PNG control plasma pool. We thank Fumie Matsuura (CellFree  
273 Sciences) and Christele Huon (Institut Pasteur) for contributing to expression of  
274 proteins.

275

276 **Conflict of Interests:**

277 RJL, MW, TT and IM are inventors on patent PCT/US17/67926 on a system, method,  
278 apparatus and diagnostic test for *Plasmodium vivax*. No other authors declare a  
279 conflict of interest.

280

281 **References:**

- 282 1. Robinson LJ, Wampfler R, Betuela I, et al. Strategies for understanding and  
283 reducing the *Plasmodium vivax* and *Plasmodium ovale* hypnozoite reservoir in  
284 Papua New Guinean children: a randomised placebo-controlled trial and  
285 mathematical model. *PLoS Med* **2015**; 12:e1001891.
- 286 2. Moreira CM, Abo-Shehada M, Price RN, Drakeley CJ. A systematic review of  
287 sub-microscopic *Plasmodium vivax* infection. *Malar J* **2015**; 14:360.

- 288 3. Longley RJ, White MT, Takashima E, et al. Development and validation of  
289 serological markers for detecting recent *Plasmodium vivax* infection. *Nature*  
290 *medicine* **2020**; 26:741-9.
- 291 4. Sutanto I, Kosasih A, Elyazar IRF, et al. Negligible Impact of Mass Screening  
292 and Treatment on Meso-endemic Malaria Transmission at West Timor in Eastern  
293 Indonesia: A Cluster-Randomised Trial. *Clin Infect Dis* **2018**.
- 294 5. Richards JS, Stanistic DI, Fowkes FJ, et al. Association between naturally  
295 acquired antibodies to erythrocyte-binding antigens of *Plasmodium falciparum*  
296 and protection from malaria and high-density parasitemia. *Clin Infect Dis* **2010**;  
297 51:e50-60.
- 298 6. Kinyanjui SM, Bull P, Newbold CI, Marsh K. Kinetics of Antibody Responses to  
299 *Plasmodium falciparum*-Infected Erythrocyte Variant Surface Antigens. *The*  
300 *Journal of Infectious Diseases* **2003**; 187:667-74.
- 301 7. Busch MP, Kleinman SH, Tobler LH, et al. Virus and Antibody Dynamics in  
302 Acute West Nile Virus Infection. *The Journal of Infectious Diseases* **2008**;  
303 198:984-93.
- 304 8. Nguitragool W, Karl S, White M, et al. Highly heterogeneous residual malaria  
305 risk in western Thailand. *Int J Parasitol* **2019**.
- 306 9. Longley RJ, White MT, Takashima E, et al. Development and validation of  
307 serological markers for detecting recent exposure to *Plasmodium*  
308 *vivax* infection. *bioRxiv* **2018**:481168.
- 309 10. Longley RJ, Franca CT, White MT, et al. Asymptomatic *Plasmodium vivax*  
310 infections induce robust IgG responses to multiple blood-stage proteins in a low-  
311 transmission region of western Thailand. *Malar J* **2017**; 16:178.

- 312 11. Team RC. A language and environment for statistical computing. Vienna,  
313 Austria: R Foundation for Statistical Computing, **2018**.
- 314 12. Venables WN. Modern applied statistics with S / W.N. Venables, B.D. Ripley.  
315 New York: Springer, **2002** (Ripley BD, Venables WNMaswSP, eds. Statistics and  
316 computing).
- 317 13. Sing T, Sander O, Beerenwinkel N, Lengauer T. ROCR: visualizing classifier  
318 performance in R. *Bioinformatics* **2005**; 21:3940-1.
- 319
- 320

321 **Figures and Tables:**

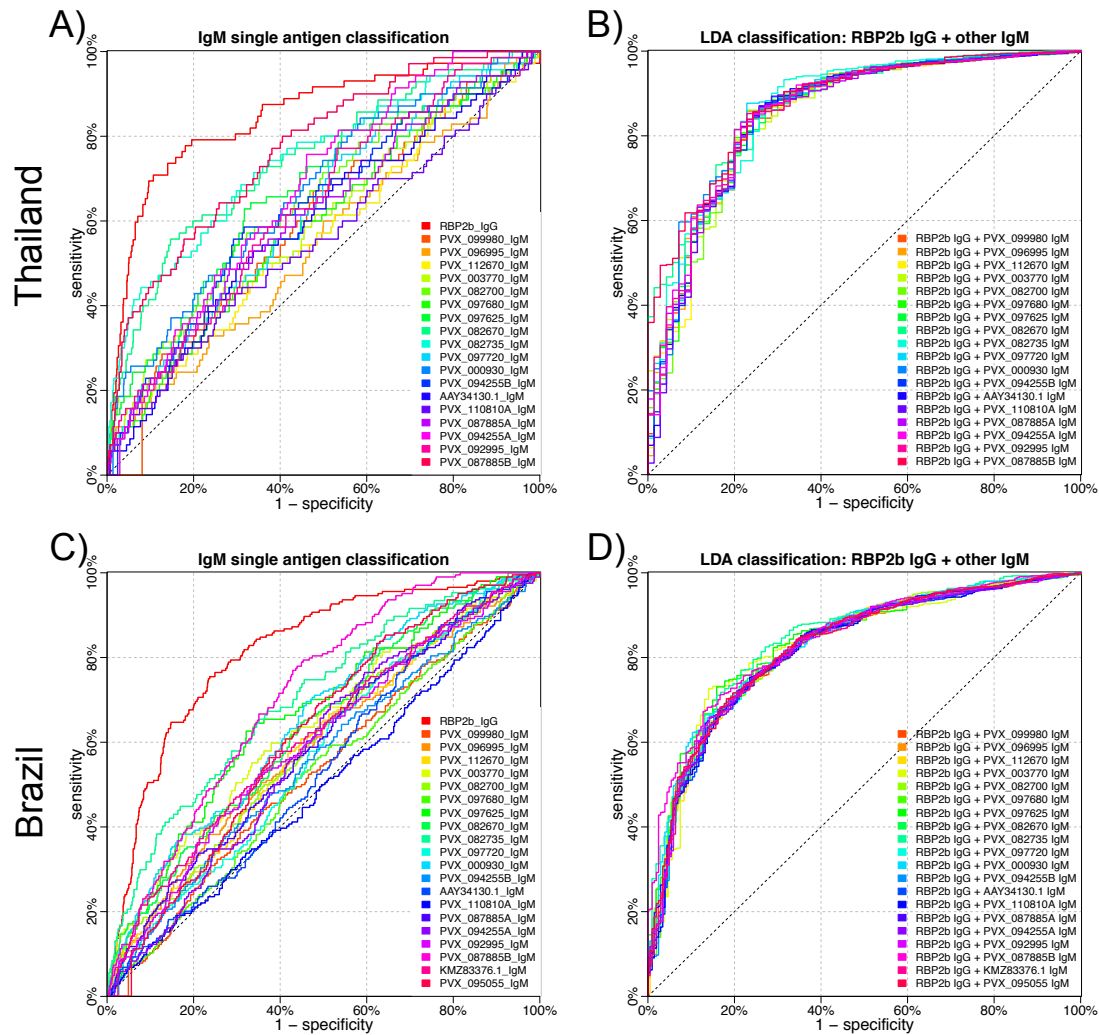

322

323 Figure 1: Performance of IgM antibodies against 18-20 *P. vivax* proteins individually  
 324 (A and C) and in combination with the top performing protein using IgG (B and D), for  
 325 classification of *P. vivax* infections within the prior 9 months. In the Thai cohort, IgM  
 326 antibody responses were measured against 18 *P. vivax* proteins. Panel A depicts the  
 327 classification accuracy of these 18 proteins individually, and includes the top  
 328 performing protein for IgG (RBP2b) as reference in red. Panel B depicts the results  
 329 from a LDA combining RBP2b IgG with each of the IgM responses to the 18 proteins.  
 330 In the Brazilian cohort, IgM antibody responses were measured against 20 *P. vivax*  
 331 proteins. Panel A depicts the classification accuracy of these 20 proteins individually,  
 332 and includes the top performing protein for IgG (RBP2b) as reference in red. Panel B

333 depicts the results from a LDA combining RBP2b IgG with each of the IgM responses  
334 to the 20 proteins. AUC values are shown in Table 1.

335

336 Table 1: AUC values for classifying individuals as recently infected with *P. vivax*. LDA  
337 (2 antigen combination) was performed using the 9 month classification period with  
338 RBP2b IgG plus IgM to one of the listed antigens. NA = not applicable. NT = not  
339 tested.

|             | Single antigen classification |               |             |               |             |               |             |               | LDA         |               |
|-------------|-------------------------------|---------------|-------------|---------------|-------------|---------------|-------------|---------------|-------------|---------------|
|             | 1 month                       |               | 3 months    |               | 6 months    |               | 9 months    |               | 9 months    |               |
| Protein     | <i>Thai</i>                   | <i>Brazil</i> | <i>Thai</i> | <i>Brazil</i> | <i>Thai</i> | <i>Brazil</i> | <i>Thai</i> | <i>Brazil</i> | <i>Thai</i> | <i>Brazil</i> |
| RBP2b (IgG) | 0.825                         | 0.880         | 0.856       | 0.823         | 0.857       | 0.823         | 0.849       | 0.818         | NA          | NA            |
| PVX_099980  | 0.621                         | 0.516         | 0.601       | 0.517         | 0.606       | 0.529         | 0.607       | 0.537         | 0.855       | 0.822         |
| PVX_096995  | 0.551                         | 0.625         | 0.537       | 0.591         | 0.548       | 0.597         | 0.549       | 0.593         | 0.853       | 0.822         |
| PVX_112670  | 0.595                         | 0.590         | 0.579       | 0.600         | 0.585       | 0.594         | 0.567       | 0.589         | 0.848       | 0.823         |
| PVX_003770  | 0.613                         | 0.734         | 0.573       | 0.660         | 0.587       | 0.644         | 0.602       | 0.633         | 0.852       | 0.827         |
| PVX_082700  | 0.665                         | 0.570         | 0.653       | 0.613         | 0.662       | 0.602         | 0.641       | 0.596         | 0.849       | 0.828         |
| PVX_097680  | 0.590                         | 0.551         | 0.577       | 0.544         | 0.593       | 0.535         | 0.593       | 0.529         | 0.851       | 0.819         |
| PVX_097625  | 0.664                         | 0.680         | 0.647       | 0.663         | 0.655       | 0.655         | 0.671       | 0.665         | 0.856       | 0.835         |
| PVX_082670  | 0.786                         | 0.617         | 0.745       | 0.650         | 0.742       | 0.639         | 0.747       | 0.635         | 0.871       | 0.827         |
| PVX_082735  | 0.786                         | 0.774         | 0.766       | 0.730         | 0.758       | 0.716         | 0.743       | 0.705         | 0.863       | 0.845         |
| PVX_097720  | 0.655                         | 0.586         | 0.629       | 0.572         | 0.632       | 0.568         | 0.628       | 0.573         | 0.858       | 0.821         |
| PVX_000930  | 0.709                         | 0.614         | 0.686       | 0.634         | 0.688       | 0.649         | 0.673       | 0.654         | 0.863       | 0.835         |
| PVX_094255B | 0.628                         | 0.577         | 0.617       | 0.545         | 0.626       | 0.562         | 0.631       | 0.560         | 0.851       | 0.819         |
| AAV34130.1  | 0.622                         | 0.518         | 0.618       | 0.519         | 0.617       | 0.541         | 0.597       | 0.540         | 0.851       | 0.819         |
| PVX_110810A | 0.580                         | 0.505         | 0.581       | 0.475         | 0.585       | 0.493         | 0.554       | 0.496         | 0.847       | 0.818         |
| PVX_087885A | 0.628                         | 0.636         | 0.611       | 0.602         | 0.625       | 0.591         | 0.615       | 0.591         | 0.851       | 0.823         |
| PVX_094255A | 0.673                         | 0.534         | 0.669       | 0.555         | 0.676       | 0.570         | 0.675       | 0.581         | 0.856       | 0.821         |
| PVX_092995  | 0.639                         | 0.584         | 0.629       | 0.601         | 0.644       | 0.595         | 0.640       | 0.599         | 0.858       | 0.823         |
| PVX_087885B | 0.799                         | 0.733         | 0.760       | 0.725         | 0.771       | 0.717         | 0.771       | 0.715         | 0.876       | 0.843         |

|            |    |       |    |       |    |       |    |       |    |       |
|------------|----|-------|----|-------|----|-------|----|-------|----|-------|
| KMZ83376.1 | NT | 0.623 | NT | 0.594 | NT | 0.612 | NT | 0.617 | NT | 0.822 |
| PVX_095055 | NT | 0.616 | NT | 0.607 | NT | 0.614 | NT | 0.624 | NT | 0.827 |

340
